# Supplementary material
Source: PubMed Central journal article supplement (PMC1458981)
Supplement: pnas_0600982103_10.pdf [file pnas_0600982103_10.pdf]

**Table 1. Tumor uptake and tissue clearance of <sup>125</sup>I-TF2 in LS-174T tumor-bearing nude mice**

Female athymic nude mice were injected s.c. with  $1 \times 10^7$  LS-174T tumor cells per mouse. After 1 week, tumors were measured and mice assigned to groups of five mice per time point. The mean tumor size at the start of this study was  $0.141 \pm 0.044 \text{ cm}^3$ . All the mice were injected with  $40 \mu\text{g } ^{125}\text{I-TF2}$  (250 pmols, 2  $\mu\text{Ci}$ ). Mice were killed and necropsied at 0.5, 2, 4, 16, 24, 48, and 72 hrs after injection. Tumor and normal tissues were removed, weighed, and placed in a  $\gamma$ -counter to determine percent-injected dose per gram tissue (% ID/g) at each time point. The mean of the % ID/g  $\pm$  SD is given.

| Tissue          | 0.5 h            | 2 h              | 4 h               | 16 h            | 24 h            | 48 h            | 72 h            |
|-----------------|------------------|------------------|-------------------|-----------------|-----------------|-----------------|-----------------|
| <b>LS-174T</b>  | 4.43 $\pm$ 1.13  | 9.19 $\pm$ 1.18  | 10.33 $\pm$ 2.05  | 5.32 $\pm$ 1.09 | 5.37 $\pm$ 0.72 | 1.69 $\pm$ 0.60 | 1.00 $\pm$ 0.13 |
| <b>Liver</b>    | 11.71 $\pm$ 2.22 | 8.39 $\pm$ 0.86  | 4.24 $\pm$ 0.11   | 0.32 $\pm$ 0.02 | 0.26 $\pm$ 0.03 | 0.15 $\pm$ 0.02 | 0.12 $\pm$ 0.01 |
| <b>Spleen</b>   | 22.04 $\pm$ 6.02 | 24.87 $\pm$ 8.22 | 15.39 $\pm$ 1.35  | 0.73 $\pm$ 0.14 | 0.45 $\pm$ 0.06 | 0.25 $\pm$ 0.08 | 0.21 $\pm$ 0.03 |
| <b>Kidney</b>   | 13.45 $\pm$ 0.64 | 6.31 $\pm$ 0.48  | 3.88 $\pm$ 0.24   | 0.31 $\pm$ 0.04 | 0.24 $\pm$ 0.03 | 0.14 $\pm$ 0.02 | 0.11 $\pm$ 0.01 |
| <b>Lungs</b>    | 9.02 $\pm$ 1.38  | 4.99 $\pm$ 0.62  | 3.91 $\pm$ 0.08   | 0.33 $\pm$ 0.06 | 0.23 $\pm$ 0.04 | 0.09 $\pm$ 0.00 | 0.06 $\pm$ 0.01 |
| <b>Blood</b>    | 36.17 $\pm$ 3.49 | 15.51 $\pm$ 2.43 | 9.06 $\pm$ 0.93   | 0.68 $\pm$ 0.07 | 0.43 $\pm$ 0.05 | 0.16 $\pm$ 0.04 | 0.11 $\pm$ 0.03 |
| <b>Stomach</b>  | 3.03 $\pm$ 0.45  | 26.00 $\pm$ 5.55 | 50.79 $\pm$ 10.83 | 0.85 $\pm$ 0.10 | 1.08 $\pm$ 0.38 | 0.23 $\pm$ 0.06 | 0.20 $\pm$ 0.03 |
| <b>Sm. Int.</b> | 2.21 $\pm$ 0.17  | 3.09 $\pm$ 0.50  | 2.08 $\pm$ 0.11   | 0.19 $\pm$ 0.03 | 0.18 $\pm$ 0.04 | 0.06 $\pm$ 0.01 | 0.05 $\pm$ 0.01 |
| <b>Lg. Int.</b> | 0.83 $\pm$ 0.03  | 1.38 $\pm$ 0.12  | 1.62 $\pm$ 0.07   | 0.21 $\pm$ 0.04 | 0.25 $\pm$ 0.05 | 0.07 $\pm$ 0.01 | 0.09 $\pm$ 0.03 |
| <b>Tail</b>     | 3.83 $\pm$ 0.16  | 3.64 $\pm$ 0.95  | 2.79 $\pm$ 0.38   | 0.19 $\pm$ 0.02 | 0.18 $\pm$ 0.05 | 0.09 $\pm$ 0.02 | 0.06 $\pm$ 0.01 |
