# Supplementary material
Source: PubMed Central journal article supplement (PMC1458981)
Supplement: pnas_0600982103_11.pdf [file pnas_0600982103_11.pdf]

**Table 2. Tumor uptake and tissue clearance of <sup>99m</sup>Tc-radiotracer pretargeted with TF2 in LS-174T tumor-bearing nude mice**

Female athymic nude mice were injected s.c. with  $1 \times 10^7$  LS-174T tumor cells per mouse. After 1 week, tumors were measured and mice assigned to groups of five mice per time point. The mean tumor size at the start of this study was  $0.105 \pm 0.068 \text{ cm}^3$ . One group of 20 mice was injected with  $80 \mu\text{g } ^{125}\text{I-TF2}$  (500 pmols, 2  $\mu\text{Ci}$ ). Mice were administered the <sup>99m</sup>Tc-di-HSG peptide (<sup>99m</sup>Tc-radiotracer, 40  $\mu\text{Ci}$ , 92 ng, 50 pmols) 16 h after injection of <sup>125</sup>I-TF2. The mice were killed and necropsied at 0.5, 1, 4, and 24 h after injection of the <sup>99m</sup>Tc-radiotracer. Tumor and normal tissues were removed, weighed, and placed in a  $\gamma$ -counter to determine percent-injected dose per gram tissue (% ID/g) of the <sup>99m</sup>Tc-radiotracer at each time point. The mean of the % ID/g  $\pm$  SD is given.

| <b><i>Tissue</i></b> | <b>0.5 h</b>    | <b>1 h</b>      | <b>4 h</b>      | <b>24 h</b>     |
|----------------------|-----------------|-----------------|-----------------|-----------------|
| <b>LS-174T</b>       | 21.8 $\pm$ 3.0  | 30.1 $\pm$ 13.7 | 25.0 $\pm$ 3.7  | 16.3 $\pm$ 2.9  |
| <b>Liver</b>         | 0.64 $\pm$ 0.07 | 0.41 $\pm$ 0.06 | 0.23 $\pm$ 0.06 | 0.14 $\pm$ 0.02 |
| <b>Spleen</b>        | 0.59 $\pm$ 0.07 | 0.30 $\pm$ 0.06 | 0.16 $\pm$ 0.08 | 0.09 $\pm$ 0.02 |
| <b>Kidney</b>        | 8.7 $\pm$ 1.4   | 5.0 $\pm$ 0.4   | 2.4 $\pm$ 0.4   | 1.2 $\pm$ 0.2   |
| <b>Lungs</b>         | 1.6 $\pm$ 0.2   | 0.69 $\pm$ 0.16 | 0.24 $\pm$ 0.05 | 0.10 $\pm$ 0.03 |
| <b>Blood</b>         | 1.7 $\pm$ 0.2   | 0.50 $\pm$ 0.12 | 0.11 $\pm$ 0.02 | 0.04 $\pm$ 0.01 |
| <b>Stomach</b>       | 0.37 $\pm$ 0.09 | 0.87 $\pm$ 1.28 | 0.09 $\pm$ 0.08 | 0.16 $\pm$ 0.09 |
| <b>Sm. Int.</b>      | 0.79 $\pm$ 0.04 | 1.08 $\pm$ 0.22 | 0.25 $\pm$ 0.12 | 0.15 $\pm$ 0.06 |
| <b>Lg. Int.</b>      | 0.30 $\pm$ 0.09 | 0.13 $\pm$ 0.03 | 1.9 $\pm$ 2.0   | 0.40 $\pm$ 0.28 |
| <b>Tail</b>          | 2.1 $\pm$ 0.4   | 0.94 $\pm$ 0.45 | 0.45 $\pm$ 0.49 | 0.06 $\pm$ 0.02 |
