# Supplementary material
Source: PubMed Central journal article supplement (PMC1458981)
Supplement: pnas_0600982103_12.pdf [file pnas_0600982103_12.pdf]

**Table 3. T/NT ratio for <sup>99m</sup>Tc-radiotracer pretargeted with TF2**

Tumor:nontumor (T:NT) ratios were calculated as the % ID/g in the tumor divided by the % ID/g in each tissue by using the results described for Table 2. T:NT ± SD are given.

| <b><i>Time after IMP245</i></b> | <b>0.5 h</b> | <b>1 h</b> | <b>4 h</b> | <b>24 h</b> |
|---------------------------------|--------------|------------|------------|-------------|
| Liver                           | 34 ± 4       | 83 ± 10    | 116 ± 32   | 115 ± 21    |
| Spleen                          | 37 ± 4       | 109 ± 21   | 170 ± 54   | 177 ± 30    |
| Kidney                          | 3 ± 0.4      | 7 ± 2      | 11 ± 2     | 14 ± 3      |
| Lungs                           | 14 ± 2       | 47 ± 4     | 106 ± 26   | 162 ± 24    |
| Blood                           | 13 ± 2       | 66 ± 5     | 237 ± 36   | 395 ± 26    |
| Stomach                         | 63 ± 25      | 169 ± 116  | 456 ± 271  | 135 ± 91    |
| Sm. Int.                        | 28 ± 3       | 35 ± 5     | 114 ± 47   | 125 ± 46    |
| Lg. Int.                        | 75 ± 17      | 241 ± 31   | 22 ± 14    | 57 ± 34     |
| Tail                            | 11 ± 3       | 37 ± 8     | 164 ± 135  | 293 ± 80    |
