# Supplementary material
Source: PubMed Central journal article supplement (PMC1458981)

**A**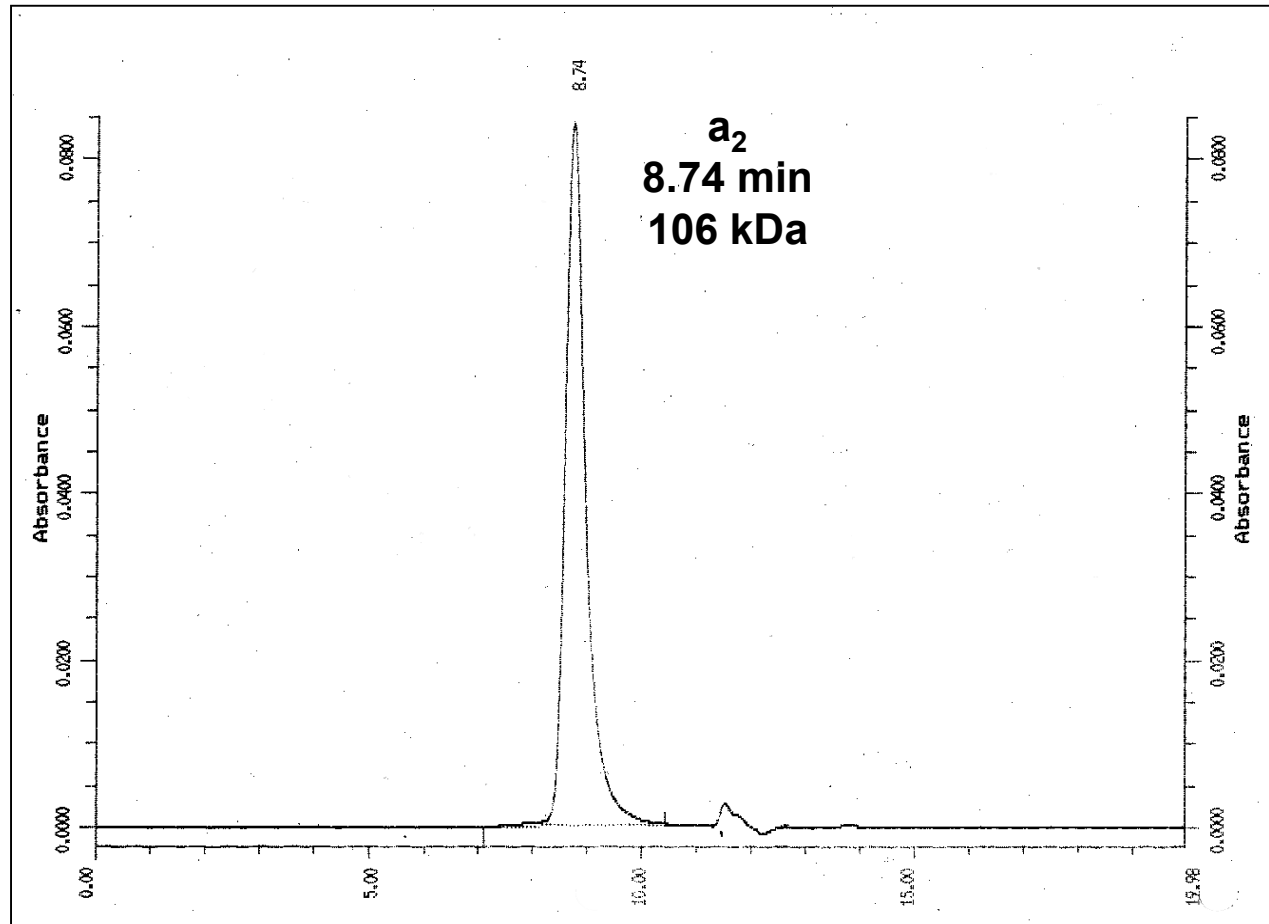**B**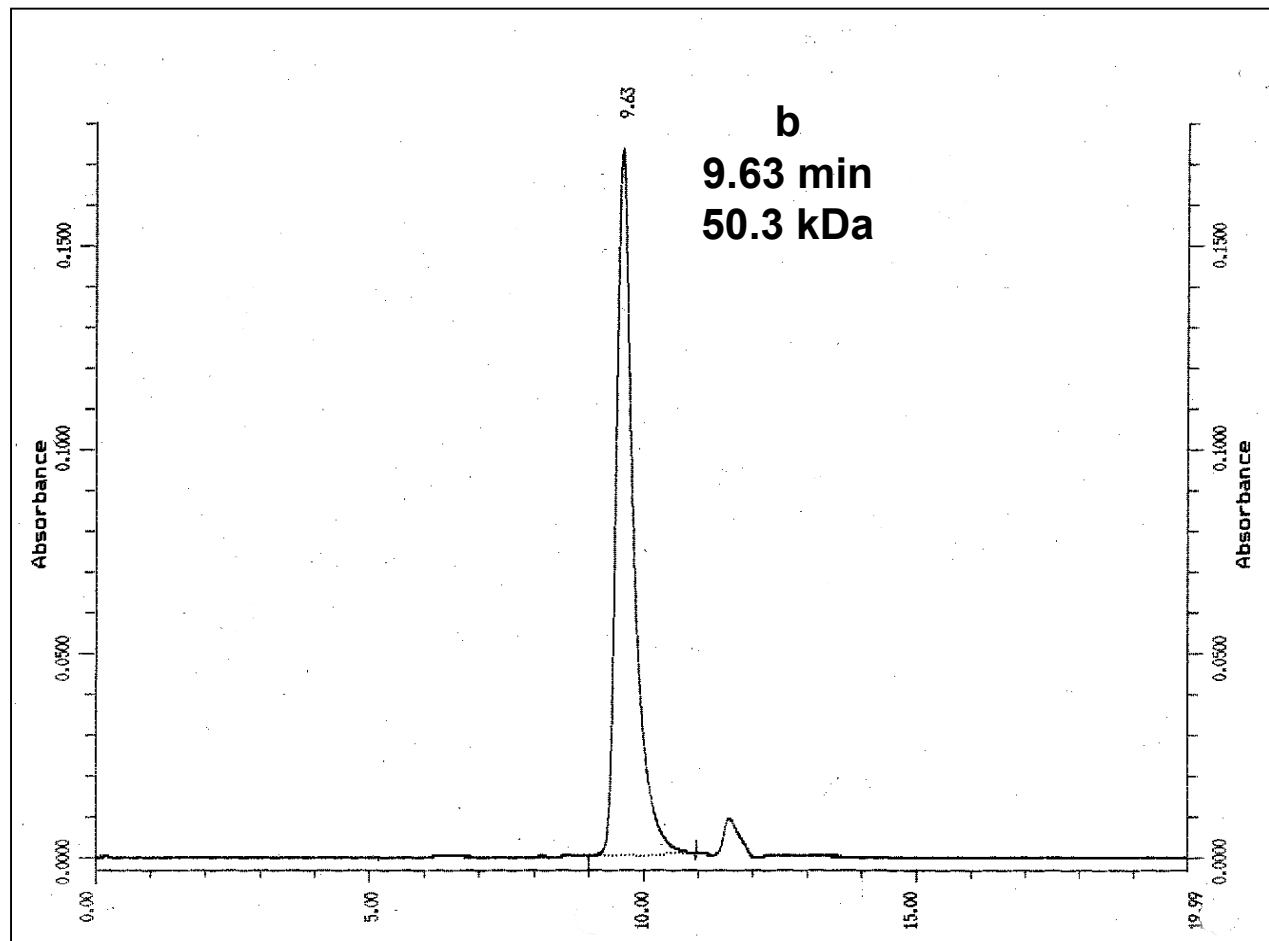

Supplement: pnas_0600982103_1.pdf [file pnas_0600982103_1.pdf]

**A**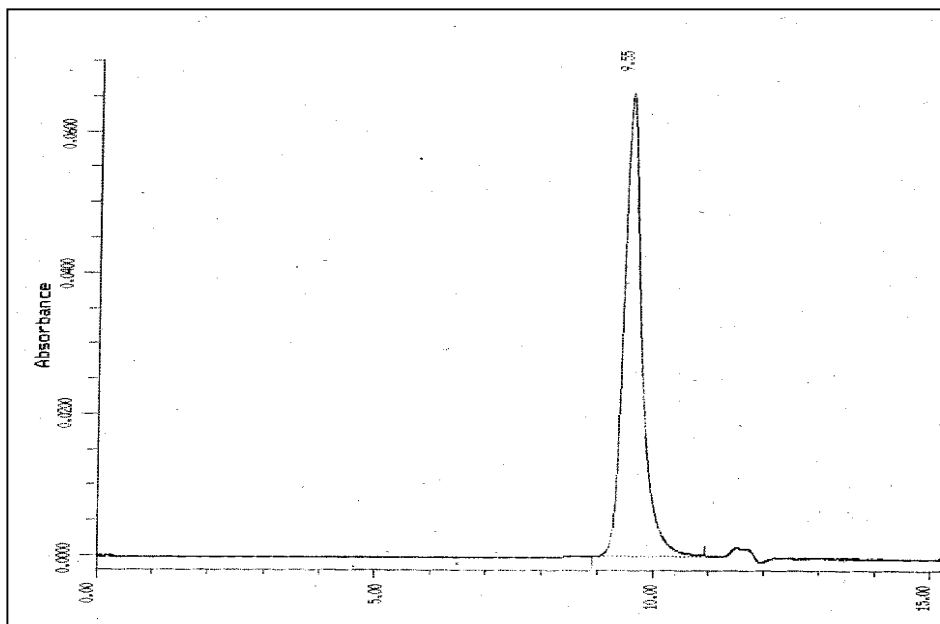**B**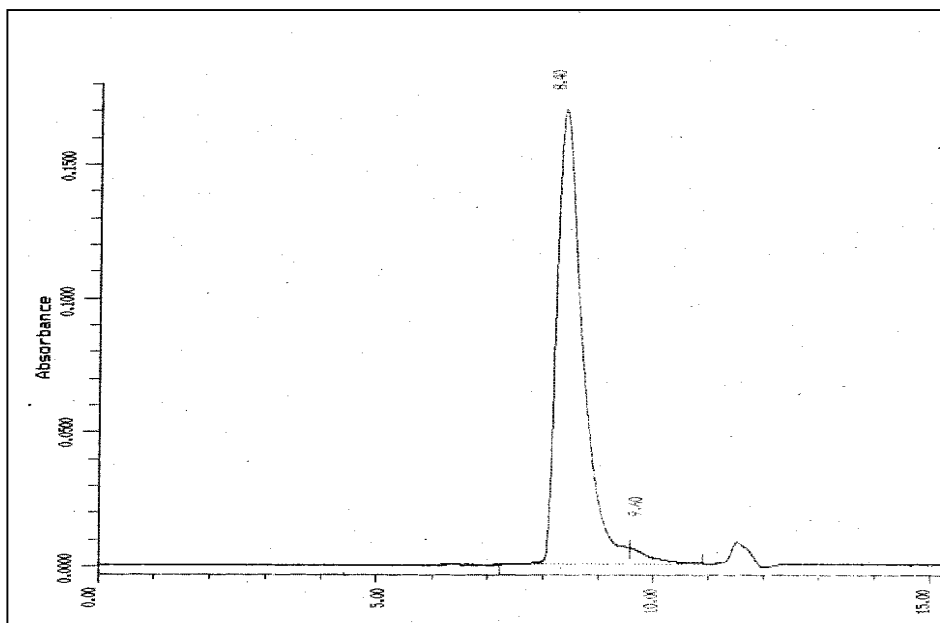**C**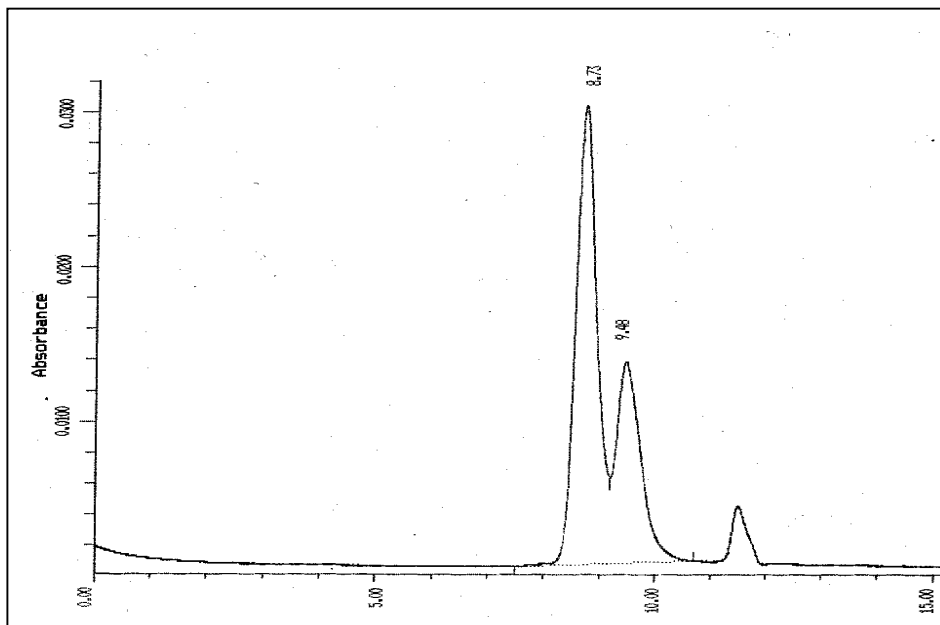

**D**

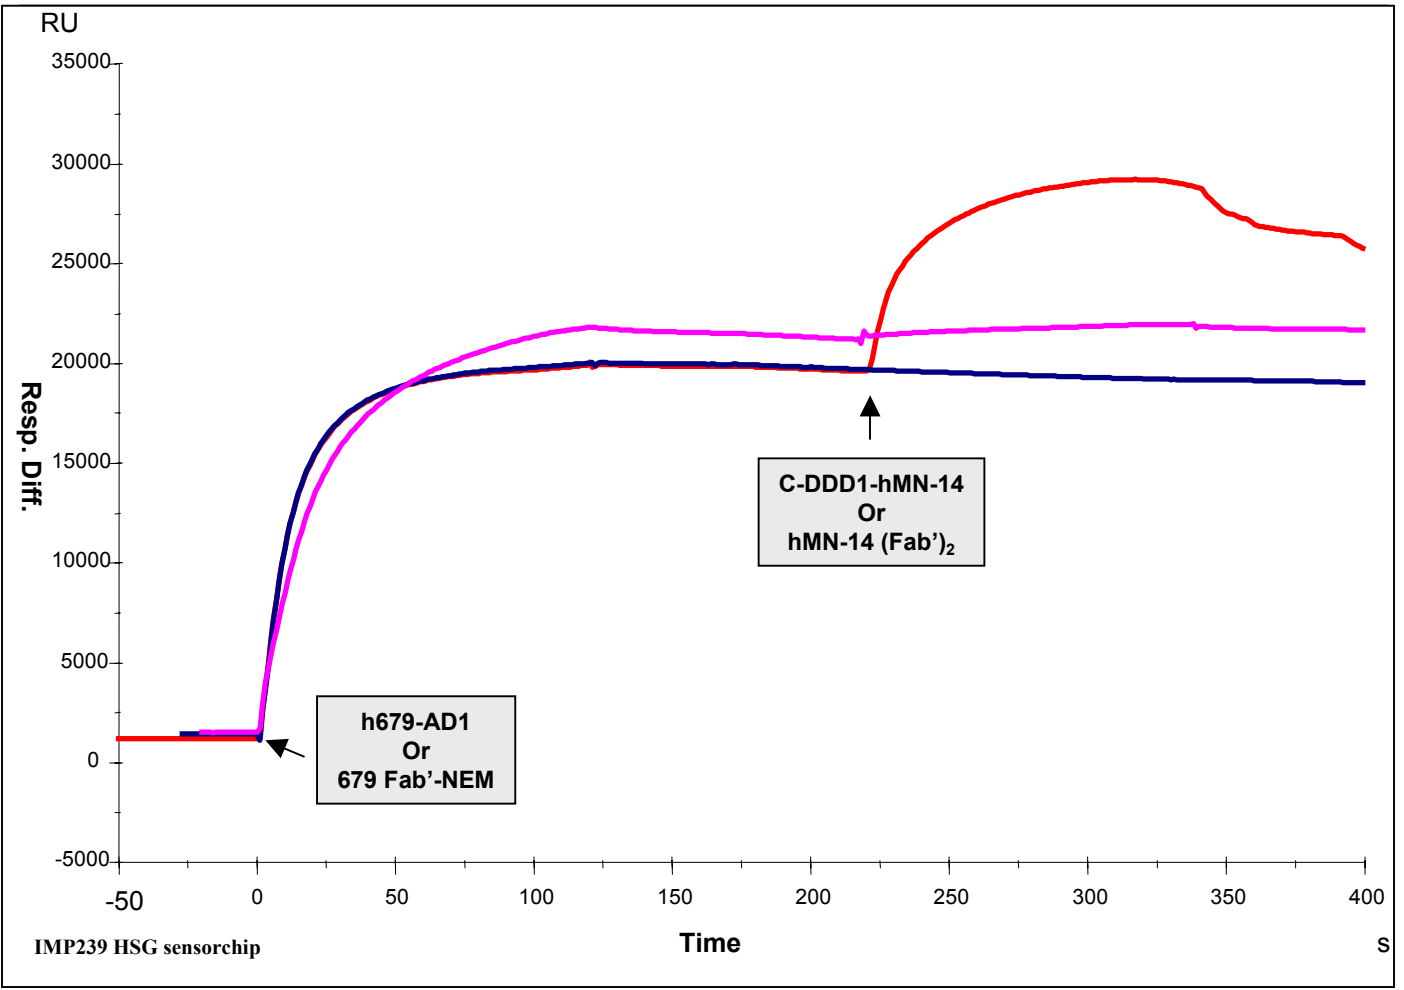

Supplement: pnas_0600982103_2.pdf [file pnas_0600982103_2.pdf]

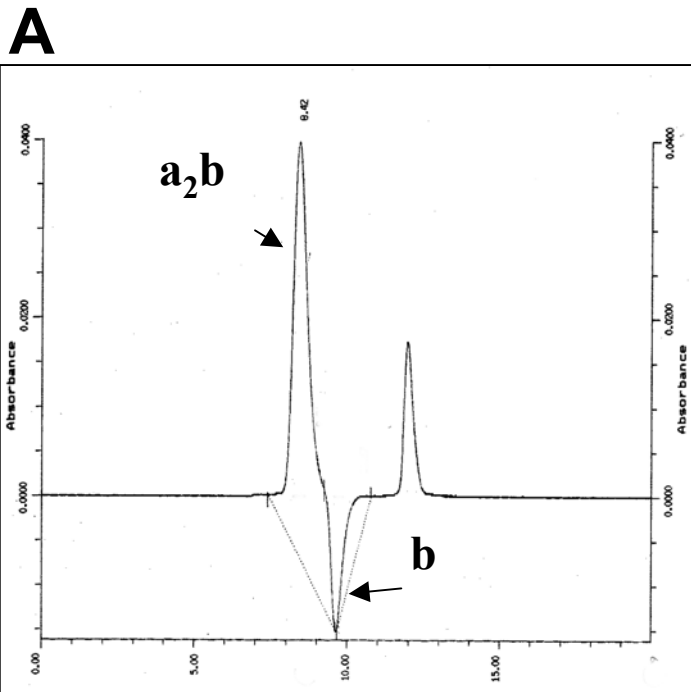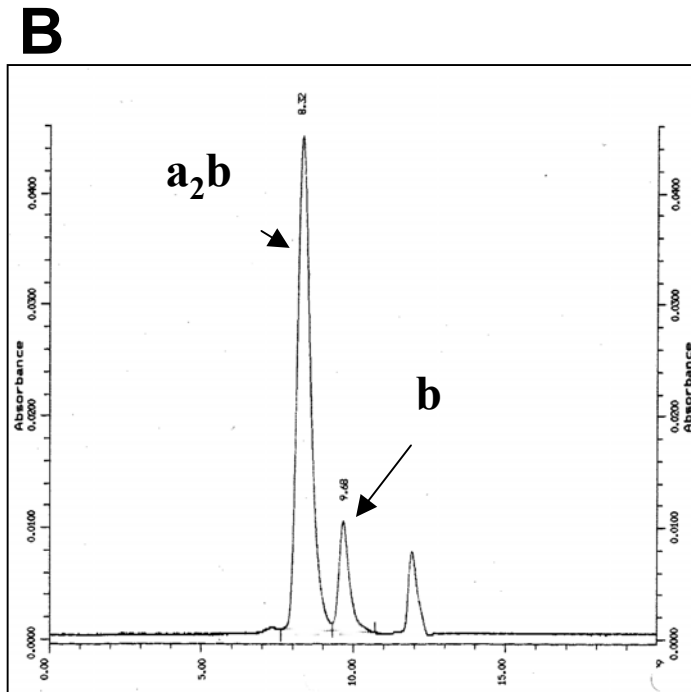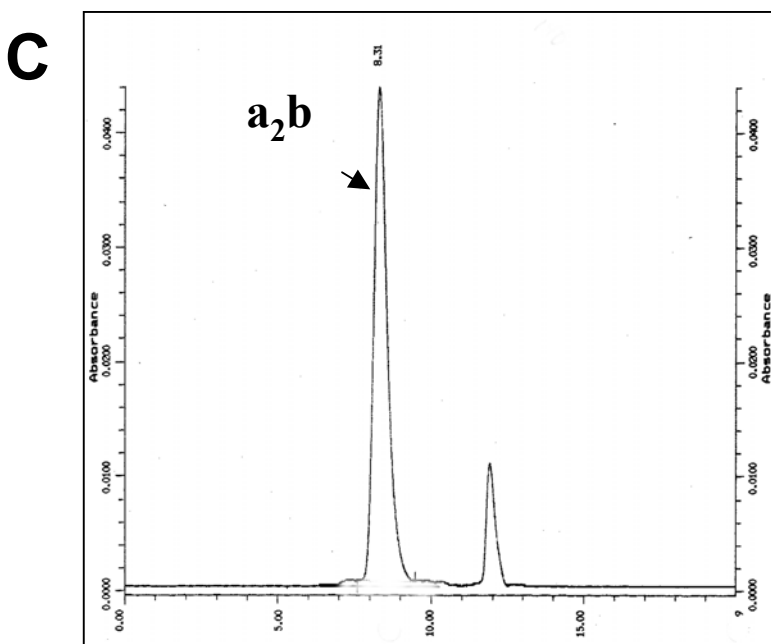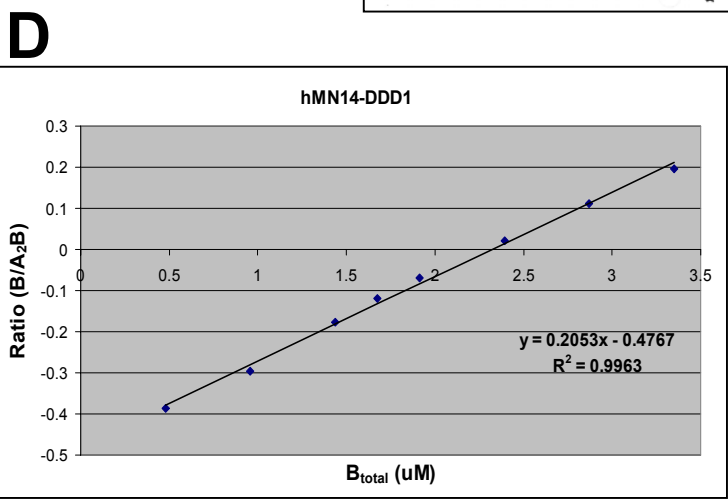

**E**

$$K_d = \frac{[A_2][B]}{[A_2B]} = \frac{[30 \text{ nM}][478 \text{ nM}]}{[1872 \text{ nM}]}$$

$$K_d = 7.7 \text{ nM}$$

Supplement: pnas_0600982103_3.pdf [file pnas_0600982103_3.pdf]

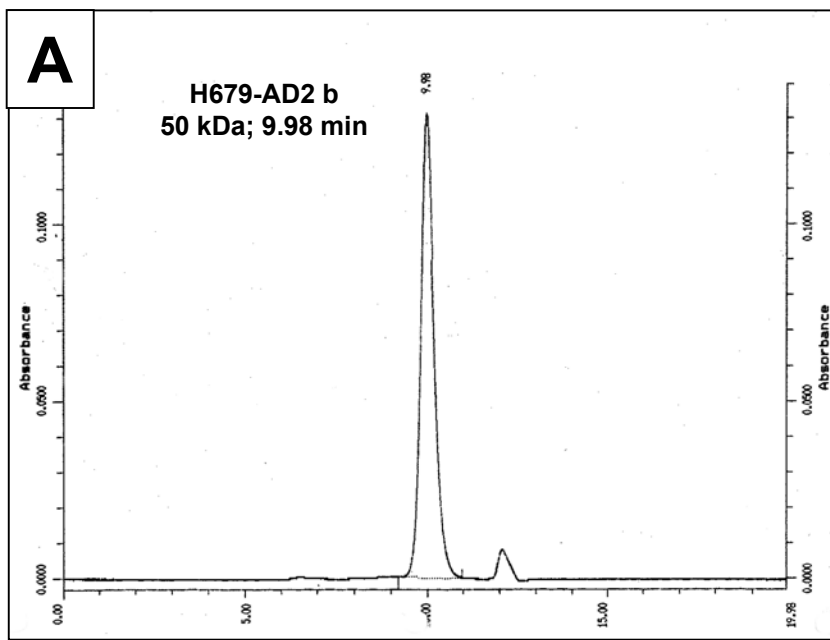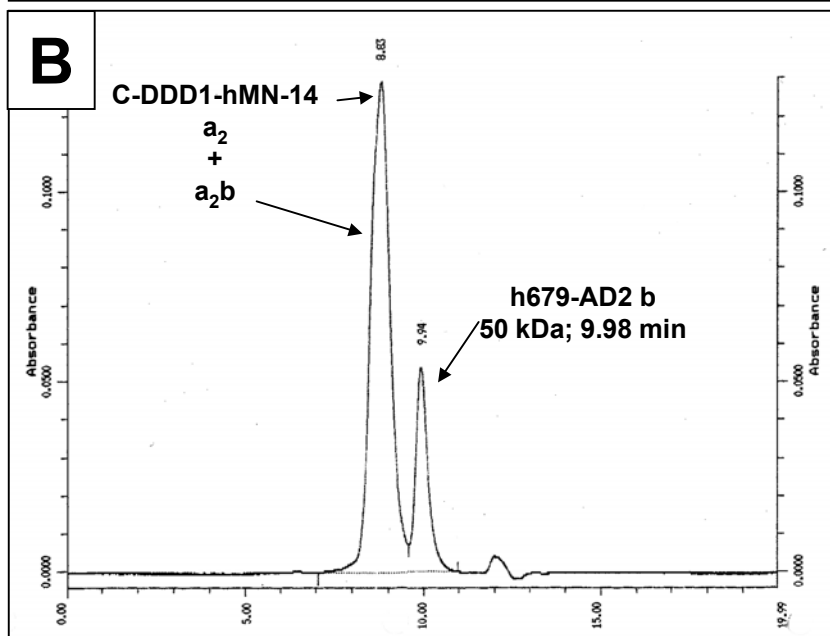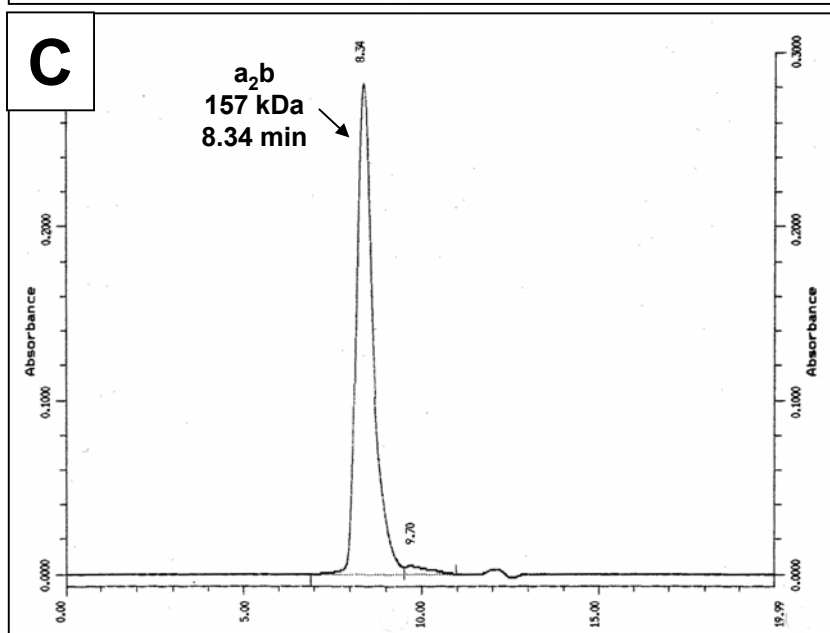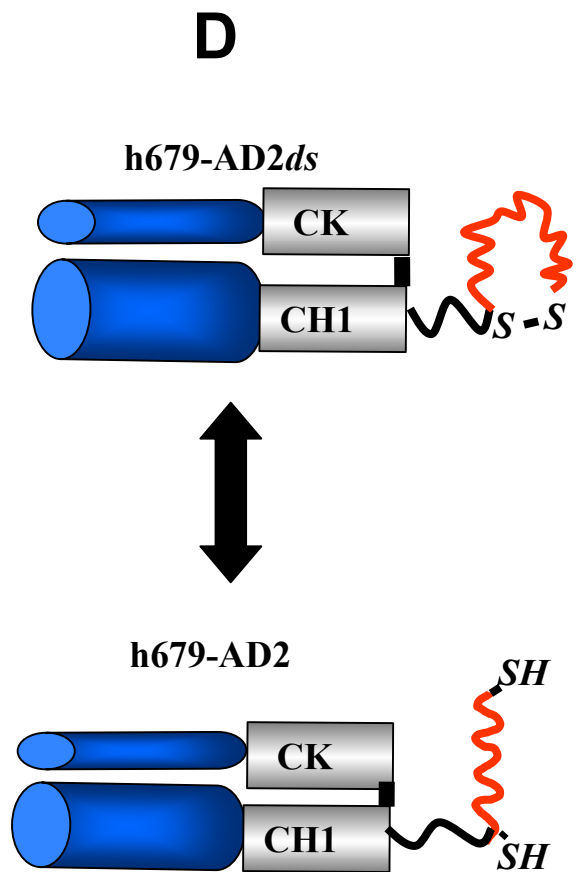

Supplement: pnas_0600982103_4.pdf [file pnas_0600982103_4.pdf]

**A**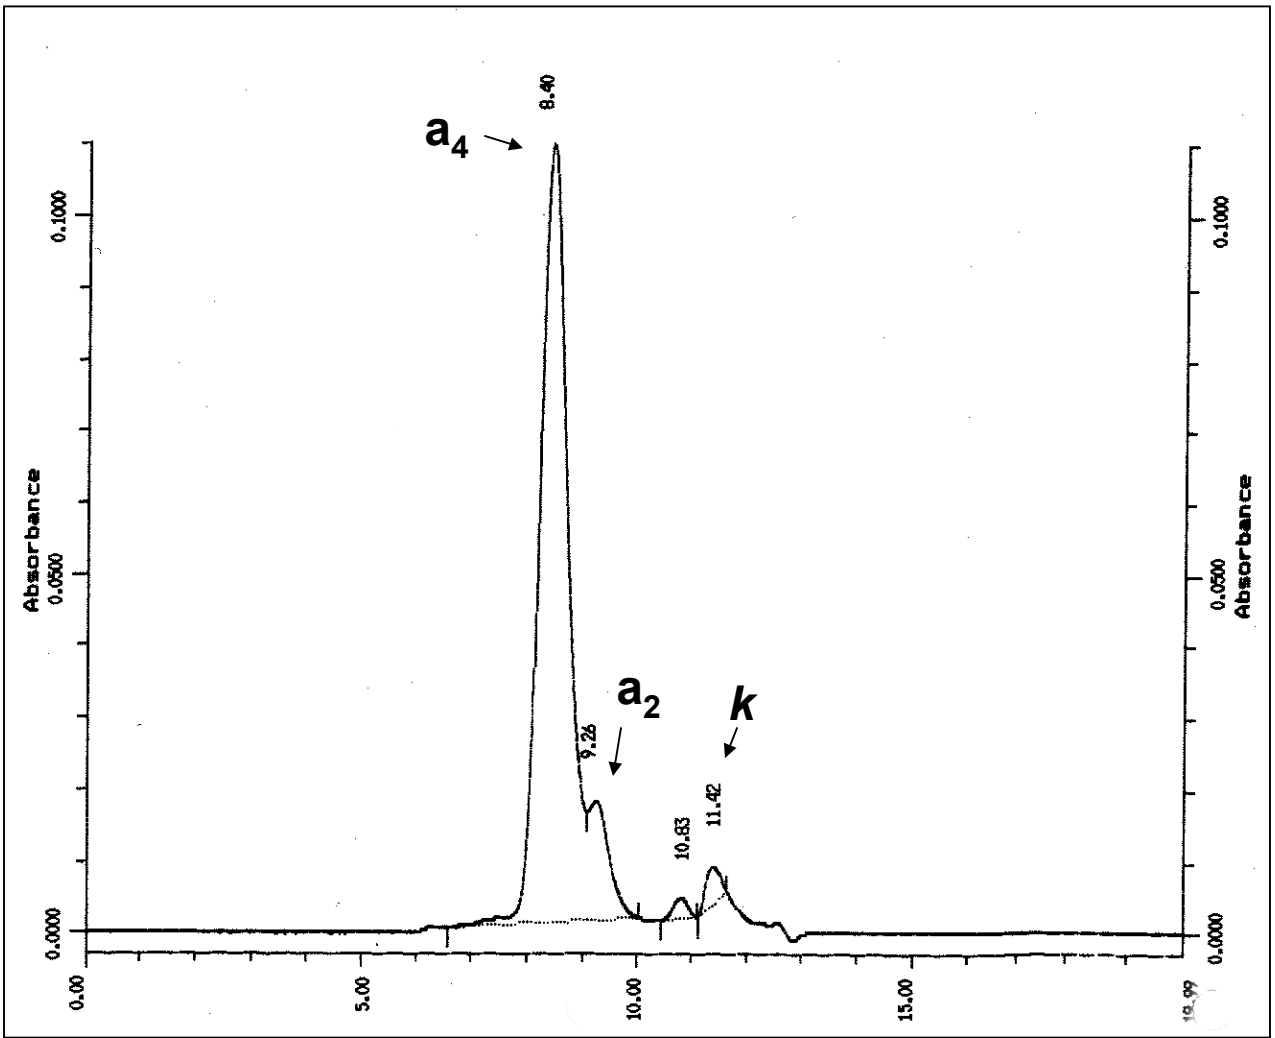**B**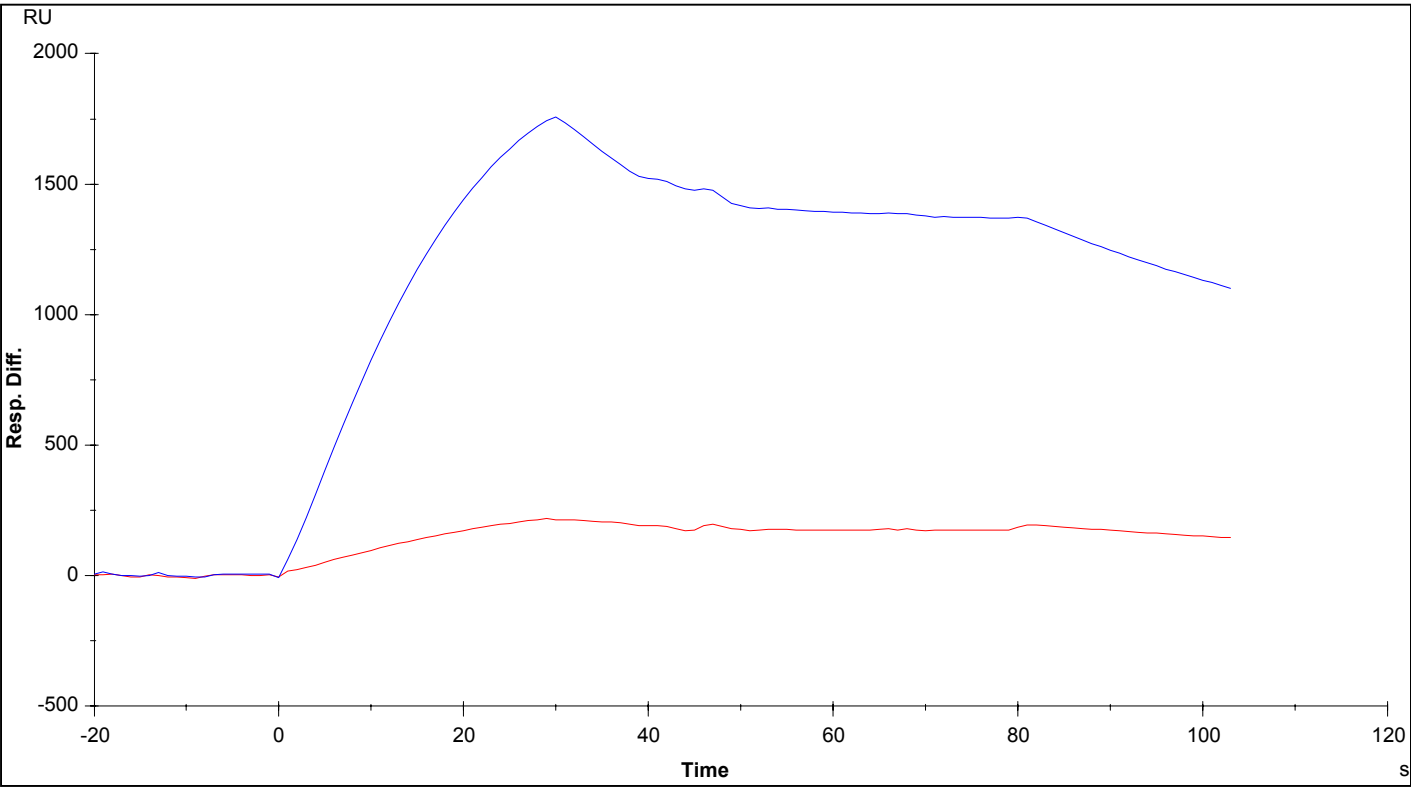

Supplement: pnas_0600982103_5.pdf [file pnas_0600982103_5.pdf]

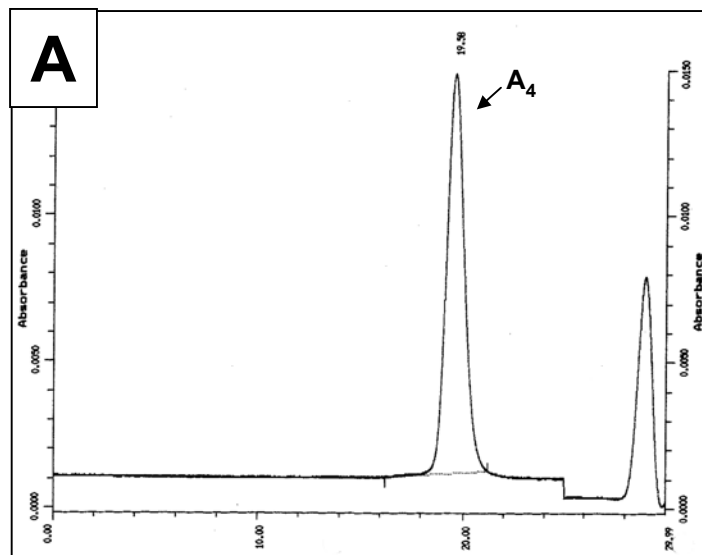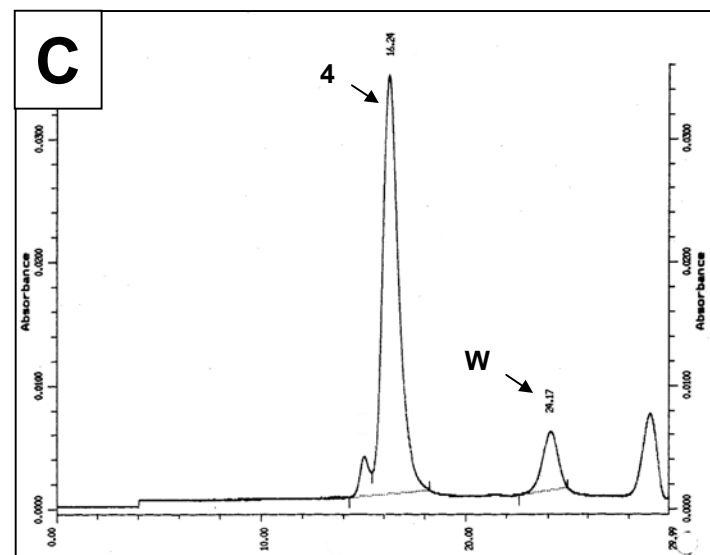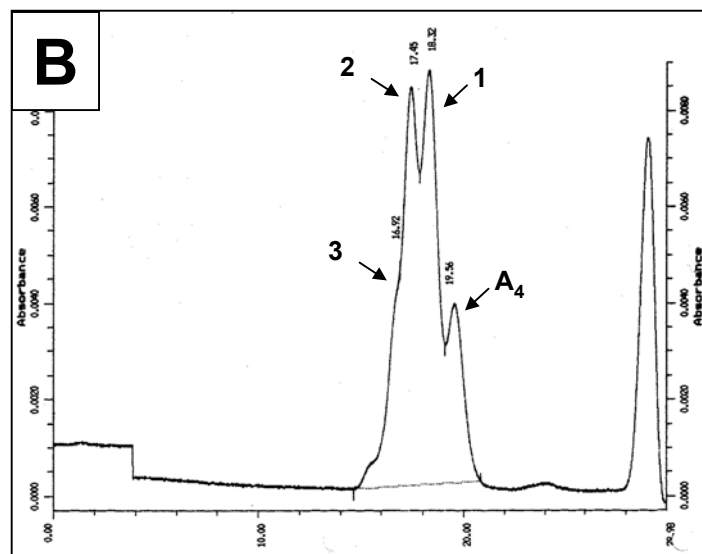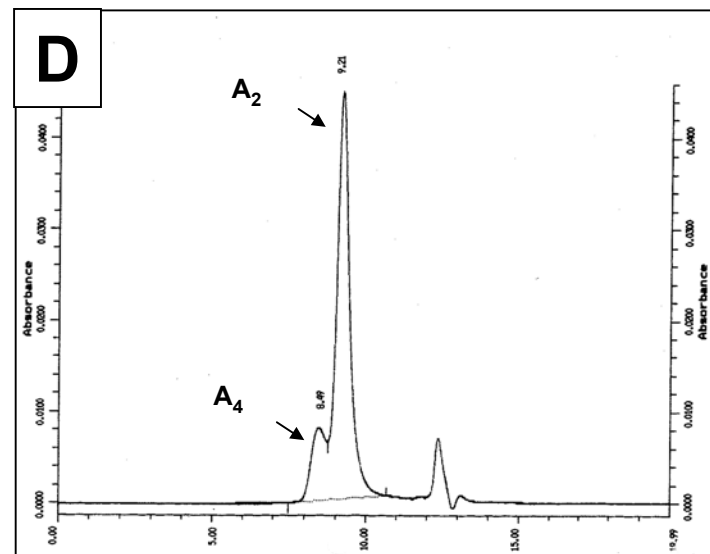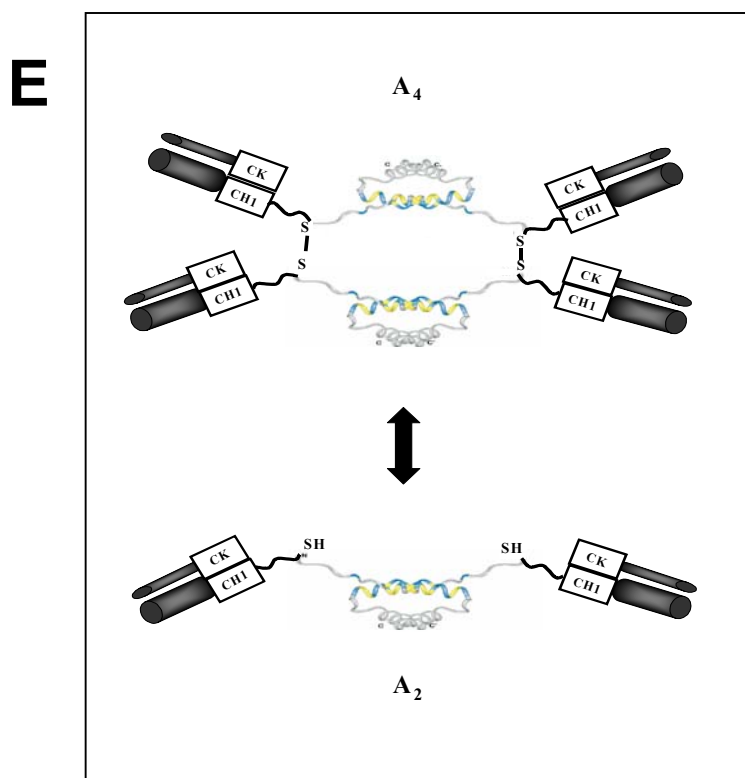

Supplement: pnas_0600982103_6.pdf [file pnas_0600982103_6.pdf]

**A**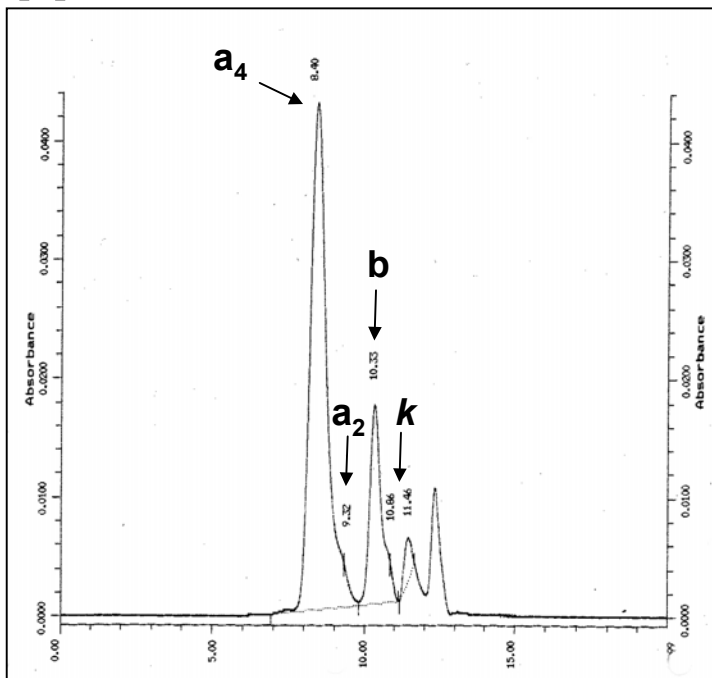**C**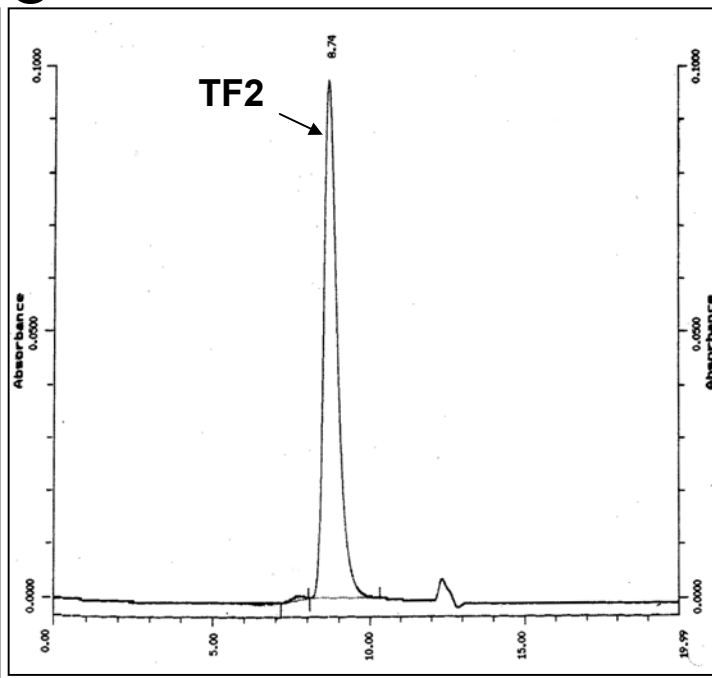**B**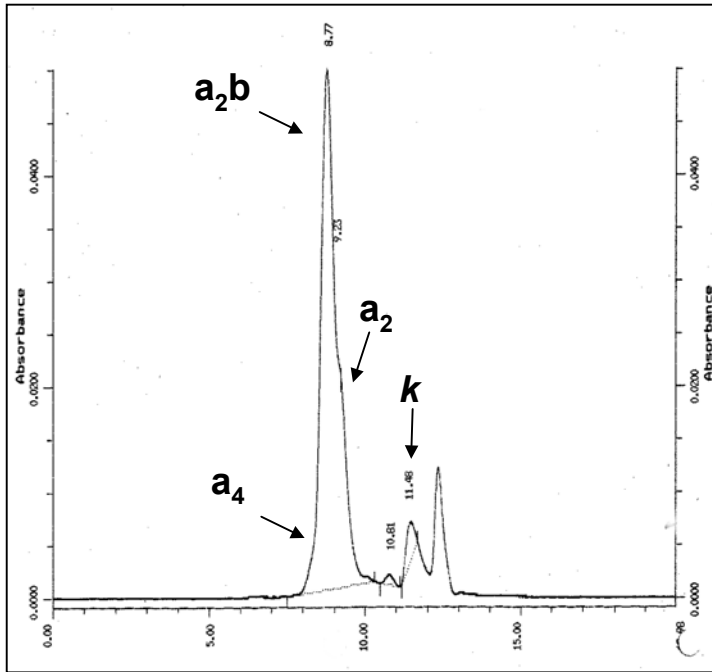**D**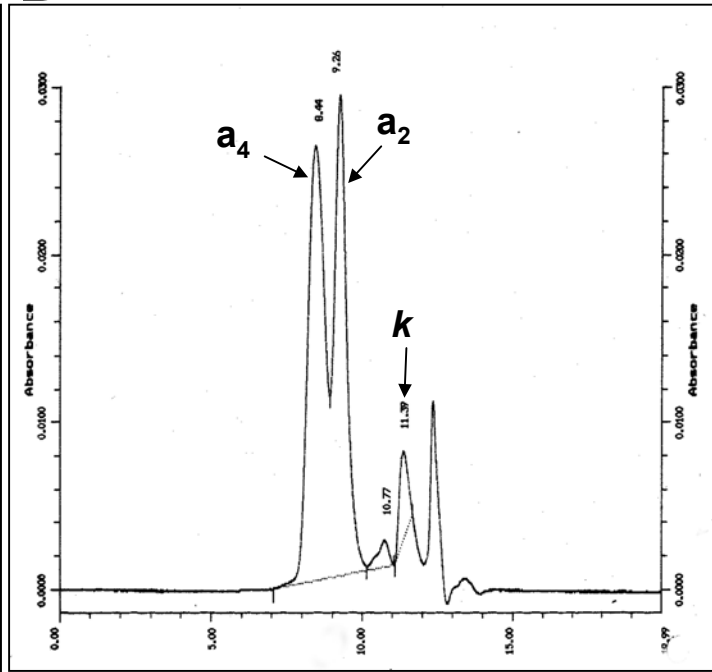

Supplement: pnas_0600982103_7.pdf [file pnas_0600982103_7.pdf]

**A**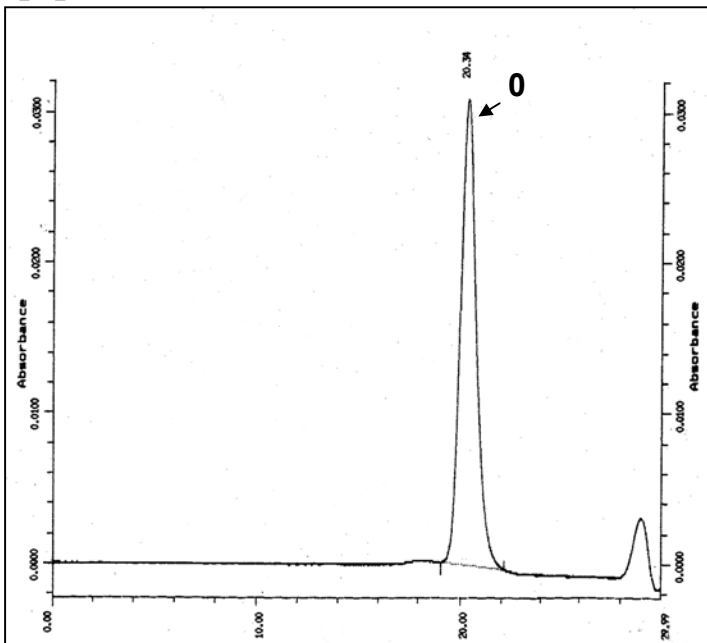**C**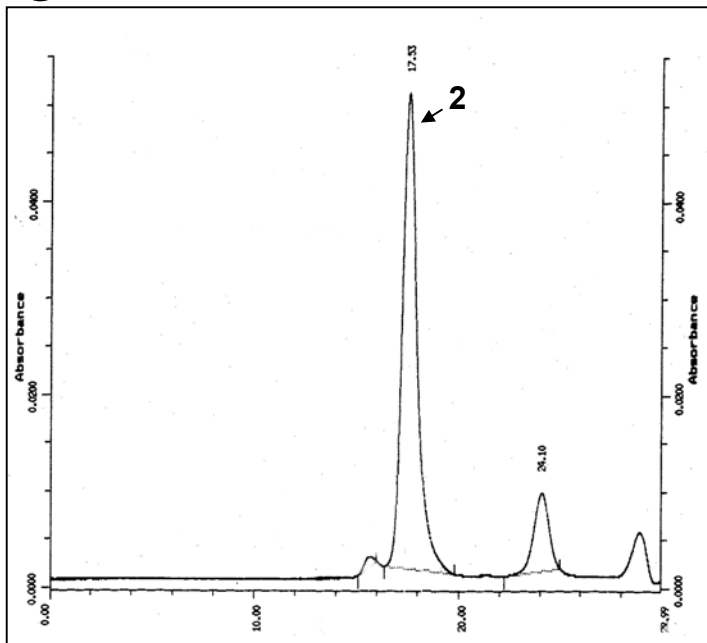**B**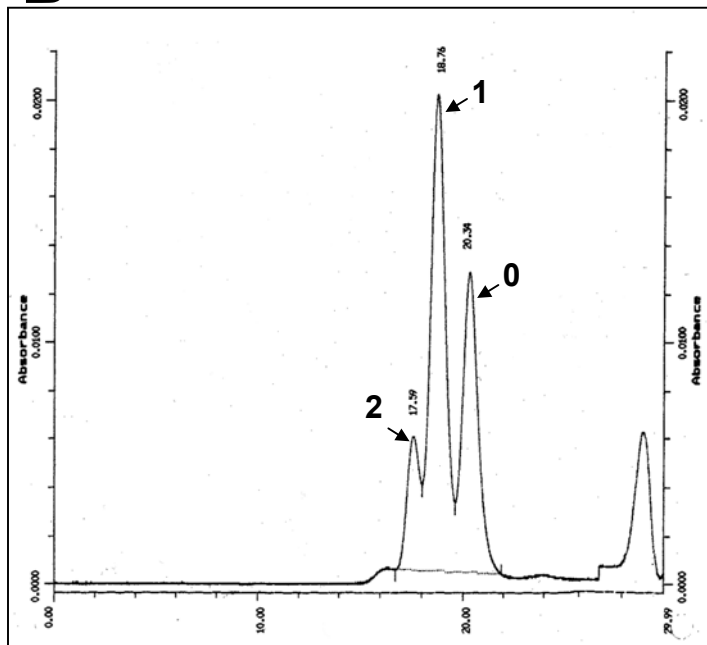**D**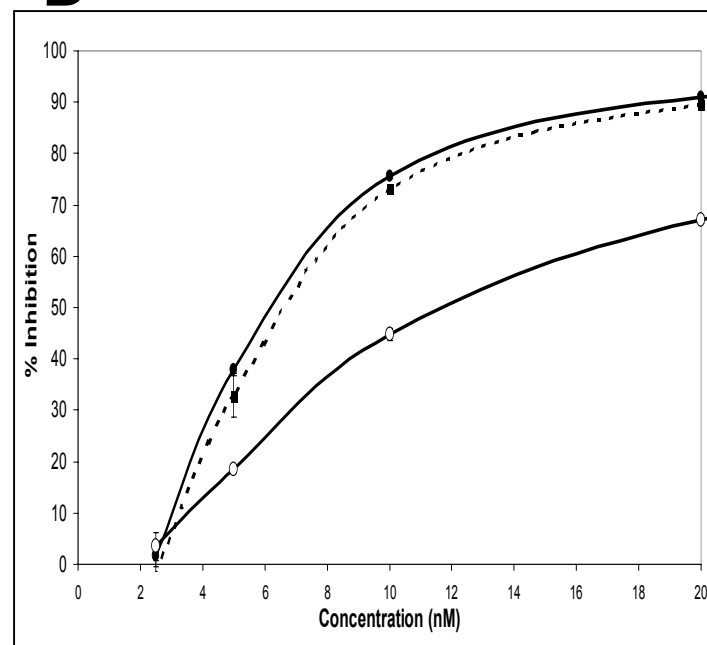

Supplement: pnas_0600982103_8.pdf [file pnas_0600982103_8.pdf]

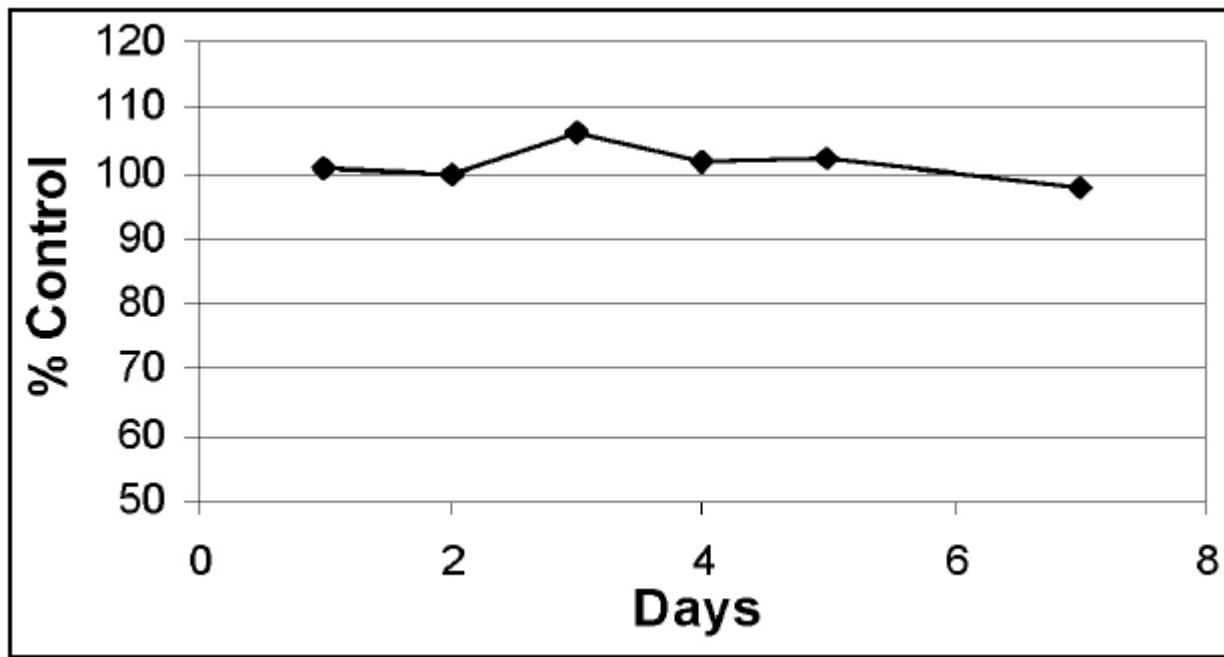

Supplement: pnas_0600982103_9.pdf [file pnas_0600982103_9.pdf]
